# Supplementary material for: Current knowledge on bioacoustics of the subfamily Lophyohylinae (Hylidae, Anura) and description of Ocellated treefrogItapotihyla langsdorffiivocalizations
Source: PeerJ journal article supplement (doi:10.7717/peerj.4813), 2018-05-31
Supplement: Table_S1.pdf [file Table_S1.pdf]

**Table S1** – List of species with undescribed calls in the subfamily Lophyohylinae, and their Biome of predominant occurrence.

| <b>Species</b>                                                                                               | <b>Biome</b>     |
|--------------------------------------------------------------------------------------------------------------|------------------|
| <i>Aparasphenodon bokermanni</i> Pombal, 1993                                                                | Atlantic forest  |
| <i>Aparasphenodon brunoi</i> Miranda-Ribeiro, 1920                                                           | Atlantic forest  |
| <i>Aparasphenodon pomba</i> Assis, Santana, Silva, Quintela, and Feio, 2013                                  | Atlantic forest  |
| <i>Aparasphenodon venezolanus</i> (Mertens, 1950)                                                            | Amazon           |
| <i>Corythomantis galeata</i> Pombal, Menezes, Fontes, Nunes, Rocha, and Van Sluys, 2012                      | Caatinga         |
| <i>Dryaderces inframaculata</i> (Boulenger, 1882)                                                            | Amazon           |
| <i>Dryaderces pearsoni</i> (Gauge, 1929)                                                                     | Amazon           |
| <i>Osteocephalus alboguttatus</i> (Boulenger, 1882)                                                          | Amazon           |
| <i>Osteocephalus cabrerai</i> (Cochran and Goin, 1970)                                                       | Amazon           |
| <i>Osteocephalus camufatus</i> Jungfer, Verdade, Faivovich, and Rodrigues, 2016                              | Amazon           |
| <i>Osteocephalus carri</i> (Cochran and Goin, 1970)                                                          | Amazon           |
| <i>Osteocephalus castaneicola</i> Moravec, Aparicio, Guerrero-Reinhard, Calderón, Jungfer, and Gvoždík, 2009 | Amazon           |
| <i>Osteocephalus duellmani</i> Jungfer, 2011                                                                 | Amazon           |
| <i>Osteocephalus festae</i> (Peracca, 1904)                                                                  | Amazon           |
| <i>Osteocephalus fuscifacies</i> Jungfer, Ron, Seipp, and Almendáriz, 2000                                   | Amazon           |
| <i>Osteocephalus helenae</i> (Ruthven, 1919)                                                                 | Amazon           |
| <i>Osteocephalus heyeri</i> Lynch, 2002                                                                      | Amazon           |
| <i>Osteocephalus leoniae</i> Jungfer and Lehr, 2001                                                          | Amazon           |
| <i>Osteocephalus mimeticus</i> (Melin, 1941)                                                                 | Amazon           |
| <i>Osteocephalus oophagus</i> Jungfer and Schiesari, 1995                                                    | Amazon           |
| <i>Osteocephalus planiceps</i> Cope, 1874                                                                    | Amazon           |
| <i>Osteocephalus subtilis</i> Martins and Cardoso, 1987                                                      | Amazon           |
| <i>Osteocephalus verruciger</i> (Werner, 1901)                                                               | Amazon           |
| <i>Osteocephalus vilarsi</i> (Melin, 1941)                                                                   | Amazon           |
| <i>Osteocephalus yasuni</i> Ron and Pramuk, 1999                                                             | Amazon           |
| <i>Osteopilus crucialis</i> (Harlan, 1826)                                                                   | Caribbean forest |
| <i>Osteopilus ocellatus</i> (Linnaeus, 1758)                                                                 | Caribbean forest |

|                                                                                 |                  |
|---------------------------------------------------------------------------------|------------------|
| <i>Osteopilus vastus</i> (Cope, 1871)                                           | Caribbean forest |
| <i>Osteopilus wilderi</i> (Dunn, 1925)                                          | Caribbean forest |
| <i>Phyllodytes brevirostris</i> Peixoto and Cruz, 1988                          | Atlantic forest  |
| <i>Phyllodytes maculosus</i> Cruz, Feio, and Cardoso, 2007                      | Atlantic forest  |
| <i>Phyllodytes punctatus</i> Caramaschi and Peixoto, 2004                       | Atlantic forest  |
| <i>Phytotriades auratus</i> (Boulenger, 1917)                                   | Amazon           |
| <i>Tepuihyla aecii</i> Ayarzagüena, Señaris, and Gorzula, 1993                  | Amazon           |
| <i>Tepuihyla exophthalma</i> (Smith and Noonan, 2001)                           | Amazon           |
| <i>Tepuihyla luteolabris</i> Ayarzagüena, Señaris, and Gorzula, 1993            | Amazon           |
| <i>Tepuihyla warreni</i> (Duellman and Hoogmoed, 1992)                          | Amazon           |
| <i>Trachycephalus "vermiculatus"</i> (Cope, 1877)                               | Caribbean forest |
| <i>Trachycephalus coriaceus</i> (Peters, 1867)                                  | Amazon           |
| <i>Trachycephalus hadroceph</i> (Duellman and Hoogmoed, 1992)                   | Amazon           |
| <i>Trachycephalus helioi</i> Nunes, Suárez, Gordo, and Pombal, 2013             | Amazon           |
| <i>Trachycephalus jordani</i> (Stejneger and Test, 5891)                        | Amazon           |
| <i>Trachycephalus lepidus</i> (Pombal, Haddad, and Cruz, 2003)                  | Atlantic forest  |
| <i>Trachycephalus macrotis</i> (Andersson, 1945)                                | Amazon           |
| <i>Trachycephalus mambaiensis</i> Cintra, Silva, Silva, Garcia, and Zaher, 2009 | savannah         |
| <i>Trachycephalus quadrangulum</i> (Boulenger, 1882)                            | Amazon           |

---
